# Supplementary material
Source: PubMed Central journal article supplement (PMC4457950)
Supplement: mmc1.pdf [file mmc1.pdf]

The American Journal of Human Genetics

Supplemental Data

## **Jump from Pre-mutation to Pathologic Expansion in *C9orf72***

Zhengrui Xi, Marka van Blitterswijk, Ming Zhang, Philip McGoldrick, Jesse R. McLean, Yana Yunusova, Erin Knock, Danielle Moreno, Christine Sato, Paul M. McKeever, Raphael Schneider, Julia Keith, Nicolae Petrescu, Paul Fraser, Maria Carmela Tartaglia, Matthew C. Baker, Neill R. Graff-Radford, Kevin B. Boylan, Dennis W. Dickson, Ian R. Mackenzie, Rosa Rademakers, Janice Robertson, Lorne Zinman, and Ekaterina Rogaeva

## Clinical Descriptions

None of the seven family members of PED25 have history of physical trauma, illegal drug abuse or pesticide exposure.

Both parents of the proband are alive without symptoms of ALS or FTLN, based on neurological assessments. The 90-year-old mother (#9685) has recent onset of mild memory loss. The 89-year-old father (#9686) has a medical history of chronic obstructive pulmonary disease and heart disease. He was an officer in the British and Canadian navy, “always mentally sharp” as reported by his children. He is still independent for all activities of daily living. His performance fell within the normal range in the Social Norm Questionnaire with a score of 16/22, but he noted some difficulty with short-term memory over the last year (at age 89), which was reflected in a MoCA score of 23/30, losing 2 points for mistakes with the clock drawing test and 5 points for delayed recall. Although the MoCA score of #9686 is within the range of mild cognitive impairment (18-26), it is still above the average (21) of the general elderly population of 70-80 years old <sup>1</sup>. His mild cognitive impairment might indicate early disease symptoms; however the MoCA score is still above the average for his age-group. Of note, 65% of Canadians older than 85 have cognitive impairment <sup>2</sup>.

The proband (#9548) developed symptoms of bulbar onset at age 57 without any evidence of cognitive deficit on a Montreal Cognitive Assessment (MoCA) <sup>3</sup> (29/30). This individual had a college education and worked as an emergency unit clerk. The medical history included hypothyroidism, chronic obstructive pulmonary disease, cholecystectomy, incontinence, hysterectomy and a hernia. Individual #9548 smoked a pack of cigarettes per day for 37 years starting at age 14 and drank a glass of red wine daily. At age 59 individual #9548 passed away and autopsy results confirmed the diagnosis of ALS with pathological signs of early stage FTLN.

One of the four proband’s siblings (#8665) also developed ALS at age 59 and passed away at age 62 (autopsy was not performed). Individual #8665 had lumbar onset ALS with primary symptoms in the upper limbs (bulbar symptoms developed at the end stage of the disease). At the time of diagnosis individual #8665 was completing an MBA degree, and MoCA score was within normal range (27/30), with one point missed for attention, orientation and delayed recall, respectively. The medical history was significant for bipolar affective disorder treated by Lithium. Individual #8665 had a history of heavy smoking (up to two packs daily) and drinking (two or more drinks daily).

Three other siblings (#9697, #9698 and #9707) remain asymptomatic at their current age (65, 65, and 51 years, respectively). They all completed a college education and worked professionally (e.g. in healthcare, human resources, or arts). All of them had smoking habits for 6-7 years (~5 cigarettes per week). They did not report any changes in their cognitive abilities, with the exception of #9698, who complained about memory issues, affecting daily activities. All three asymptomatic siblings underwent cognitive screening using MoCA and ALS Cognitive Behavioural Screen <sup>4</sup>, showing performance within normal range.

A.

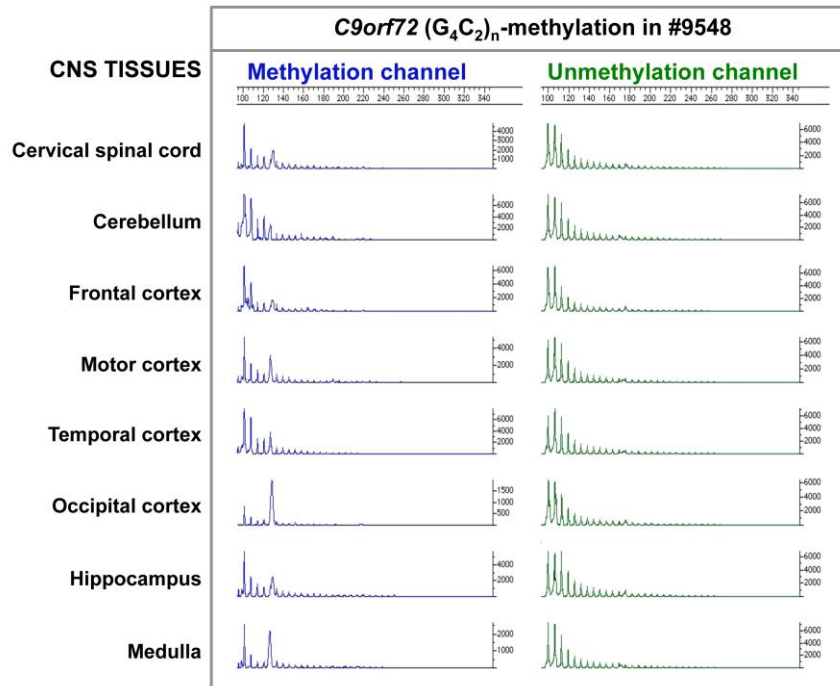

B.

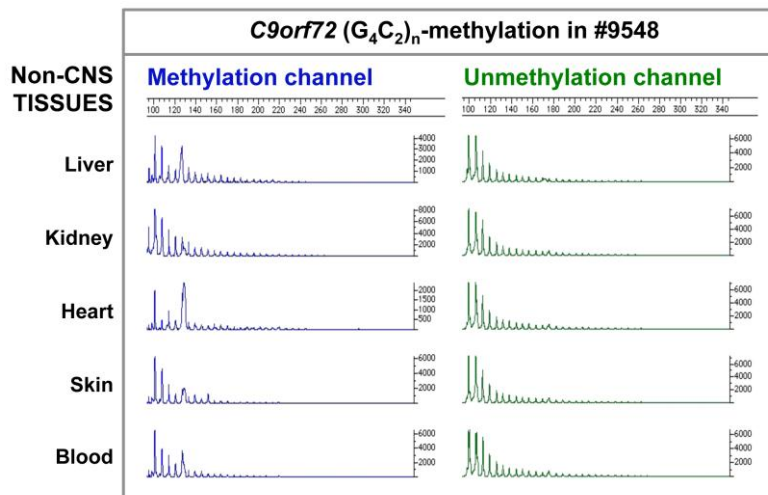

Figure S1. Chromatograms of the (G<sub>4</sub>C<sub>2</sub>)<sub>n</sub>-methylation assay for #9548 in multiple autopsy tissues: (A) central nervous system (CNS) tissues (B) non-CNS tissues

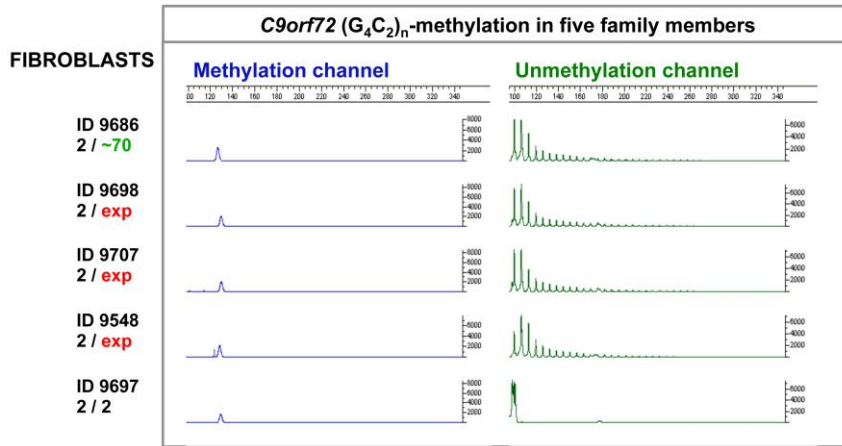

**Figure S2. Chromatograms of the (G<sub>4</sub>C<sub>2</sub>)<sub>n</sub>-methylation assay for PED25 in fibroblast samples**

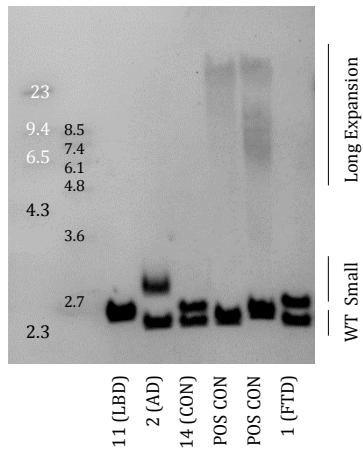

**Figure S3. Southern blot results for subjects with small expansions or repeats in the long wild-type range.**

Subjects are diagnosed with Lewy Body Dementia (LBD), Alzheimer's disease (AD), frontotemporal dementia (FTD), or they are unaffected (CON). Two positive controls are included with a long expansion on one allele and wild-type alleles of 2 and 11, respectively (POS CON). Case #2 has been described by Wojtas *et al.*<sup>5</sup>. Numbers correspond to Table S1.

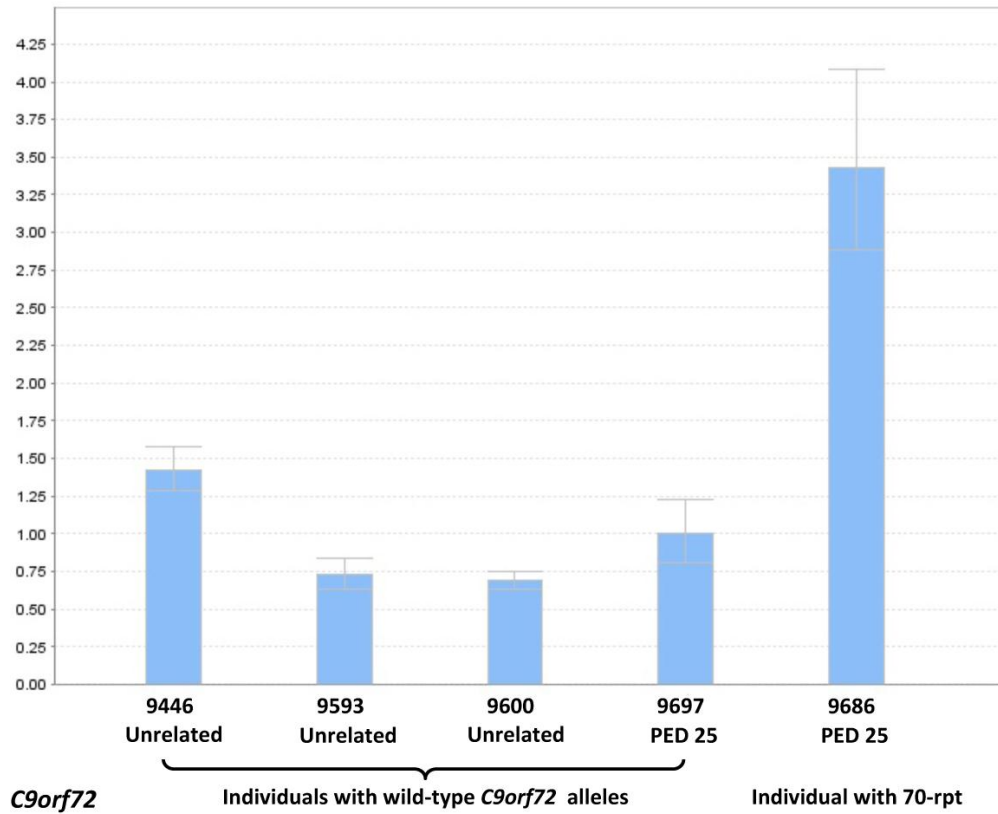

**Figure S4. Relative quantification of *C9orf72* mRNA in blood from unrelated normal controls and the individual with the small expansion**

The individual with the small expansion #9686 (2/~70) showed increased *C9orf72* gene expression compared to three unrelated normal controls: #9446 (2/22), #9593 (2/8) and #9600 (2/2), as well as PED25 family member #9697 with normal alleles. Bars represent the standard error of the triplicate reactions.

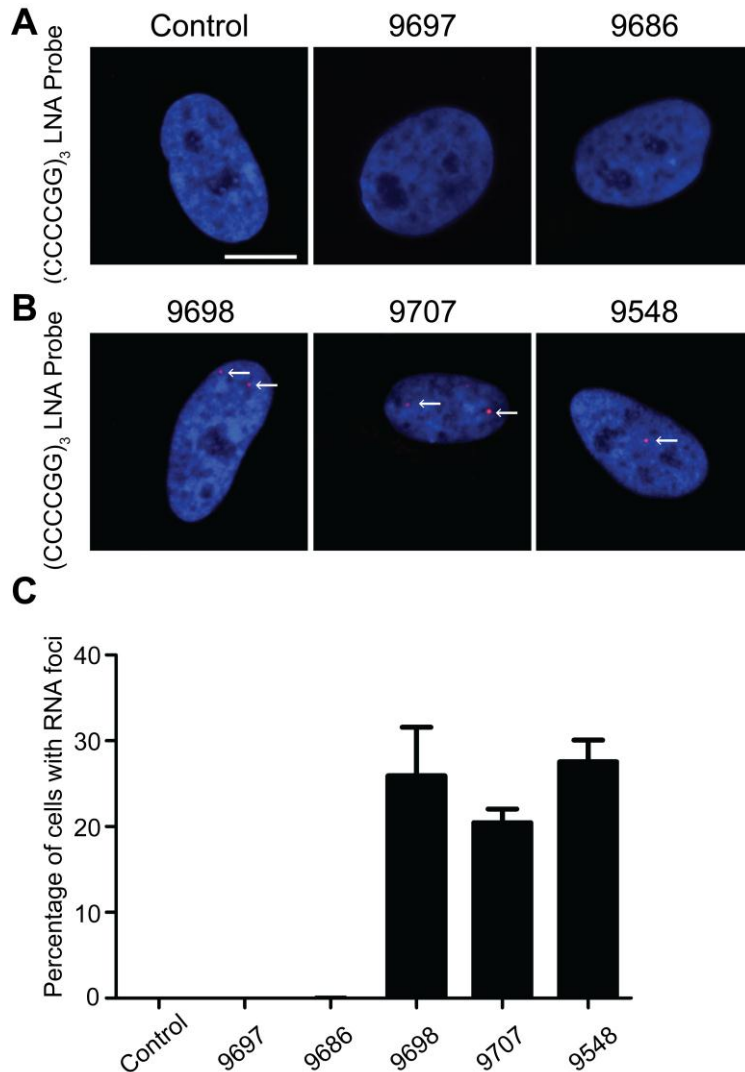

**Figure S5. RNA foci were detected in fibroblasts from individuals with large expansions but not from the individual with the 70-repeat allele or unrelated control**

RNA FISH using a probe complementary to the *C9orf72*-repeat expansion on fibroblasts from the control (#9697) or the individual with 70-repeat allele (#9686) did not detect RNA foci (**A**; scale bar = 10 $\mu$ m). However, RNA foci were detected in fibroblasts from subjects with large expansions: #9698, #9707 and #9548 (**B**, white arrows). Quantification of the number of RNA foci-positive cells in repeat expansion carriers revealed approximately 20-27% of cells to be positive for RNA foci (**C**). N = 3 experiments per fibroblast line, except 9686 (n = 2). Data are mean  $\pm$  SEM. RNA FISH was based on previously published protocols<sup>6,7</sup>. Briefly, fibroblasts plated on 13mm glass coverslips were washed with RNase-free PBS (Ambion) before fixation with 4% paraformaldehyde for 15 minutes at ambient temperature. Cells were permeabilized with PBS containing 0.2% (w/v) Triton X-100 for 10 minutes and washed once with 2 X saline sodium citrate (SSC) (Sigma) buffer. For prehybridization, cells were incubated with 2 X SSC containing 50% (v/v) formamide for 30 minutes at 60°C, followed by incubation with hybridization solution for 30 minutes at 60°C (50% formamide, 2 X SSC, 10% dextran, 0.2% bovine serum albumin, 2mM vanadyl ribonucleoside complex, 1mg/ml tRNA, 1mg/ml single stranded DNA from salmon sperm). A locked nucleic acid (LNA) probe, recognizing the sense strand (CCCCGG<sub>3</sub>) of the repeat expansion and with a 5'-TYE 563 fluorescent modification (Lagier-Tourenne et al., 2013; Exiqon catalogue number 607323), was denatured for 5 minutes at 85°C before addition to the hybridization solution to create a working concentration of 40nM. Cells were then incubated with probe for 2 hours at 60°C, and protected from light. This

was followed by three 20 minutes washes with 2 X SSC containing 50% formamide (v/v) at 60°C with shaking, and finally three 10 minute washes with 2 X SSC, with shaking. Coverslips were mounted with Prolong gold containing DAPI (Life Technologies). To quantify the number of cells expressing RNA foci, 10 random images were captured at 63x magnification per coverslip using a Leica DMI 6000 microscope with Velocity software (PerkinElmer). The number of RNA foci-positive cells was expressed as a percentage of total cells.

**Table S1. Short tandem repeat (STR) markers and single nucleotide polymorphisms (SNPs) for subjects with small expansions or repeats in the long wild-type range**

| Marker     | Mb    | 1 (FTD) |     | 2 (AD) |     | 3 (FTD/MND) |     |
|------------|-------|---------|-----|--------|-----|-------------|-----|
|            |       | a1      | a2  | a1     | a2  | a1          | a2  |
| D9S171     | 24.53 | 175     | 183 | 185    | 167 | 169         | 185 |
| D9S1679    | 24.78 | 135     | 131 | 135    | 131 | 131         | 135 |
| D9S259     | 26.02 | 288     | 292 | 288    | 294 | 288         | 288 |
| D9S2154    | 26.17 | 146     | 150 | 150    | 158 | 150         | 150 |
| *rs4879515 | 27.48 | T       | C   | T      | C   | T           | C   |
| *rs3849942 | 27.54 | A       | G   | A      | G   | A           | G   |
| *C9orf72   | 27.57 | EXP     | 2   | EXP    | 2   | EXP         | 2   |
| D9S161     | 27.63 | 129     | 131 | 117    | 129 | 117         | 127 |
| D9S319     | 29.55 | 171     | 174 | 171    | 171 | 163         | 171 |

| Marker     | Mb   | 4 (CON) |     | 5 (CON) |     | 6 (MND) |     | 7 (AD) |     | 8 (CON) |     | 9 (CON) |     | 10 (MND) |     | 11 (LBD) |     | 12 (MND) |     | 13 (AD) |     | 14 (CON) |     |
|------------|------|---------|-----|---------|-----|---------|-----|--------|-----|---------|-----|---------|-----|----------|-----|----------|-----|----------|-----|---------|-----|----------|-----|
|            |      | a1      | a2  | a1      | a2  | a1      | a2  | a1     | a2  | a1      | a2  | a1      | a1  | a1       | a2  | a1       | a2  | a1       | a2  | a1      | a2  | a1       | a2  |
| D9S171     | 24.5 | 167     | 175 | 167     | 175 | 175     | 181 | 167    | 183 | 167     | 175 | 169     | 175 | 169      | 179 | 167      | 183 | 183      | 185 | 169     | 175 | 175      | 181 |
| D9S1679    | 24.8 | 131     | 135 | 135     | 135 | 135     | 131 | 135    | 137 | 131     | 135 | 131     | 135 | 131      | 135 | 133      | 135 | 131      | 133 | 131     | 137 | 131      | 131 |
| D9S259     | 26.0 | 288     | 294 | 280     | 280 | 288     | 280 | 280    | 292 | 280     | 292 | 288     | 292 | 280      | 292 | 288      | 292 | 288      | 280 | 292     | 292 | 280      | 288 |
| D9S2154    | 26.2 | 158     | 158 | 150     | 154 | 146     | 150 | 154    | 154 | 146     | 150 | 150     | 154 | 150      | 150 | 134      | 150 | 146      | 154 | 154     | 158 | 134      | 150 |
| *rs4879515 | 27.5 | T       | C   | T       | T   | T       | T   | T      | C   | T       | C   | T       | T   | T        | C   | T        | T   | T        | T   | T       | T   | T        | C   |
| *rs3849942 | 27.5 | A       | G   | A       | G   | A       | G   | A      | G   | A       | G   | A       | A   | A        | G   | A        | A   | A        | A   | A       | G   | A        | G   |
| *C9orf72   | 27.6 | 21      | 2   | 21      | 5   | 21      | 2   | 21     | 2   | 22      | 2   | 23      | 8   | 23       | 2   | 27       | 20  | 27       | 10  | 27      | 5   | 27       | 2   |
| D9S161     | 27.6 | 119     | 127 | 125     | 127 | 129     | 131 | 117    | 131 | 117     | 129 | 127     | 129 | 119      | 127 | 117      | 127 | 127      | 127 | 127     | 131 | 117      | 117 |
| D9S319     | 29.5 | 171     | 175 | 167     | 167 | 163     | 167 | 171    | 174 | 167     | 175 | 159     | 167 | 167      | 171 | 167      | 171 | 167      | 171 | 167     | 171 | 171      | 174 |

Subjects are diagnosed with frontotemporal dementia (FTD), Alzheimer’s disease (AD), FTD with motor neuron disease (FTD/MND), MND, or Lewy Body Dementia (LBD); the remaining subjects are unaffected (CON). The *C9orf72* row displays the number of repeats on allele 1 (a1) and allele 2 (a2). Repeat expansions are indicated with ‘EXP’. A Southern blot showing the small repeat expansion for subject #1 and #2 (subject #3 has been published elsewhere<sup>8</sup>); and two representative samples with long wild-type alleles are provided in Figure S3. All samples share a small region that is thought to represent the risk-haplotype (denoted by the asterisks).



## Supplemental References

1. Rossetti, H.C., Lacritz, L.H., Cullum, C.M., and Weiner, M.F. (2011). Normative data for the Montreal Cognitive Assessment (MoCA) in a population-based sample. *Neurology* 77, 1272-1275.
2. Graham, J.E., Rockwood, K., Beattie, B.L., Eastwood, R., Gauthier, S., Tuokko, H., and McDowell, I. (1997). Prevalence and severity of cognitive impairment with and without dementia in an elderly population. *Lancet* 349, 1793-1796.
3. Nasreddine, Z.S., Phillips, N.A., Bedirian, V., Charbonneau, S., Whitehead, V., Collin, I., Cummings, J.L., and Chertkow, H. (2005). The Montreal Cognitive Assessment, MoCA: a brief screening tool for mild cognitive impairment. *J Am Geriatr Soc* 53, 695-699.
4. Woolley, S.C., York, M.K., Moore, D.H., Strutt, A.M., Murphy, J., Schulz, P.E., and Katz, J.S. (2010). Detecting frontotemporal dysfunction in ALS: utility of the ALS Cognitive Behavioral Screen (ALS-CBS). *Amyotroph Lateral Scler* 11, 303-311.
5. Wojtas, A., Heggeli, K.A., Finch, N., Baker, M., Dejesus-Hernandez, M., Younkin, S.G., Dickson, D.W., Graff-Radford, N.R., and Rademakers, R. (2012). C9ORF72 repeat expansions and other FTD gene mutations in a clinical AD patient series from Mayo Clinic. *Am J Neurodegener Dis* 1, 107-118.
6. Lagier-Tourenne, C., Baughn, M., Rigo, F., Sun, S., Liu, P., Li, H.R., Jiang, J., Watt, A.T., Chun, S., Katz, M., et al. (2013). Targeted degradation of sense and antisense C9orf72 RNA foci as therapy for ALS and frontotemporal degeneration. *Proc Natl Acad Sci U S A* 110, E4530-4539.
7. Mizielinska, S., Gronke, S., Niccoli, T., Ridler, C.E., Clayton, E.L., Devoy, A., Moens, T., Norona, F.E., Woollacott, I.O., Pietrzyk, J., et al. (2014). C9orf72 repeat expansions cause neurodegeneration in *Drosophila* through arginine-rich proteins. *Science* 345, 1192-1194.
8. van Blitterswijk, M., Dejesus-Hernandez, M., Niemantsverdriet, E., Murray, M.E., Heckman, M.G., Diehl, N.N., Brown, P.H., Baker, M.C., Finch, N.A., Bauer, P.O., et al. (2013). Association between repeat sizes and clinical and pathological characteristics in carriers of C9ORF72 repeat expansions (Xpansize-72): a cross-sectional cohort study. *Lancet Neurol* 12, 978-988.
